# Supplementary material for: Modulation of Intratumoral Fusobacterium nucleatum to Enhance Sonodynamic Therapy for Colorectal Cancer with Reduced Phototoxic Skin Injury
Source: PubMed Central journal article supplement — ACS Nano. 2023 May 18;17(12):11466–80. doi: 10.1021/acsnano.3c01308 (PMC10311605; doi:10.1021/acsnano.3c01308), 2023-05-18
Supplement: nn3c01308_si_001.pdf [file nn3c01308_si_001.pdf]

## Supporting Information

### **Modulation of Intratumoral *Fusobacterium nucleatum* to Enhance Sonodynamic Therapy for Colorectal Cancer with Reduced Phototoxic Skin Injury**

*Xiao Qu*<sup>1‡</sup>, *Fang Yin*<sup>1‡</sup>, *Manman Pei*<sup>1‡</sup>, *Qian Chen*<sup>1\*</sup>, *Yuanyuan Zhang*<sup>1</sup>, *Shengwei Lu*<sup>1</sup>, *Xuelian Zhang*<sup>1</sup>, *Ziyuan Liu*<sup>1</sup>, *Xinyao Li*<sup>1</sup>, *Hangrong Chen*<sup>3</sup>, *Yang Zhang*<sup>2,1\*</sup>, *Huanlong Qin*<sup>1\*</sup>

<sup>1</sup> Nanomedicine and Intestinal Microecology Research Center, Shanghai Tenth People's Hospital, School of Medicine, Tongji University, Shanghai 200072, China

<sup>2</sup> Precision Medicine Center, Taizhou Central Hospital, 999 Donghai Road, Taizhou, Zhejiang, 318000, China

<sup>3</sup> State Key Laboratory of High Performance Ceramics and Superfine Microstructure, Shanghai Institute of Ceramics, Shanghai 200050, China

\*Corresponding authors:

Qian Chen, E-mail: chenqian163329@163.com;

Yang Zhang, E-mail: zhangyang0202@tongji.edu.cn;

Huanlong Qin, E-mail: hlongqin@126.com

‡ The authors contributed equally to this paper.

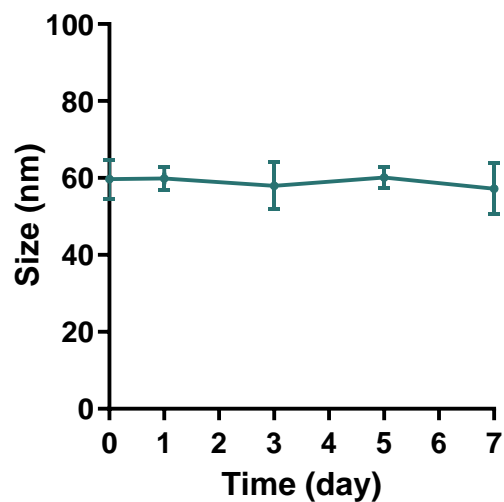

**Figure S1.** The average diameter of Au@BSA-CuPpIX in 7 days.

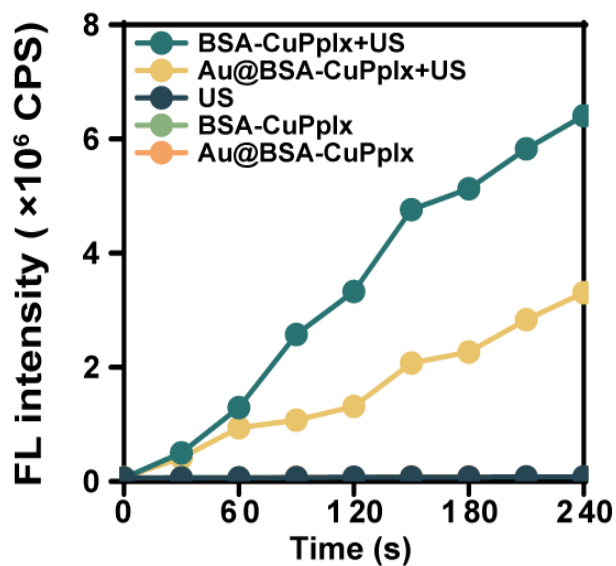

**Figure S2.** Fluorescence intensity of single oxygen sensor green (SOSG) under different conditions with or without US radiation.

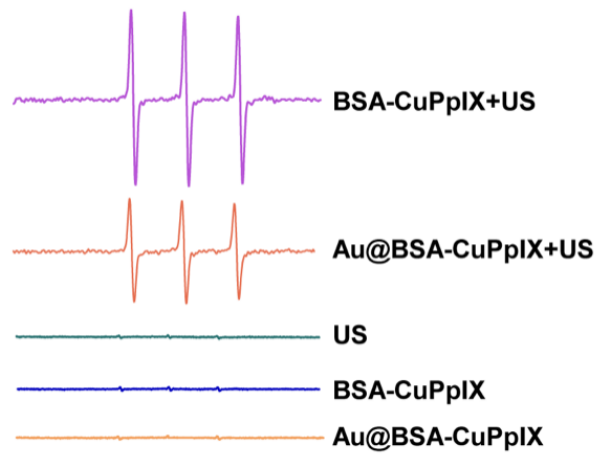

**Figure S3.** ESR spectra of BSA-CuPpIX+US, Au@BSA-CuPpIX+US, US, BSA-CuPpIX, and Au@BSA-CuPpIX groups, TEMP as a trapping agent.

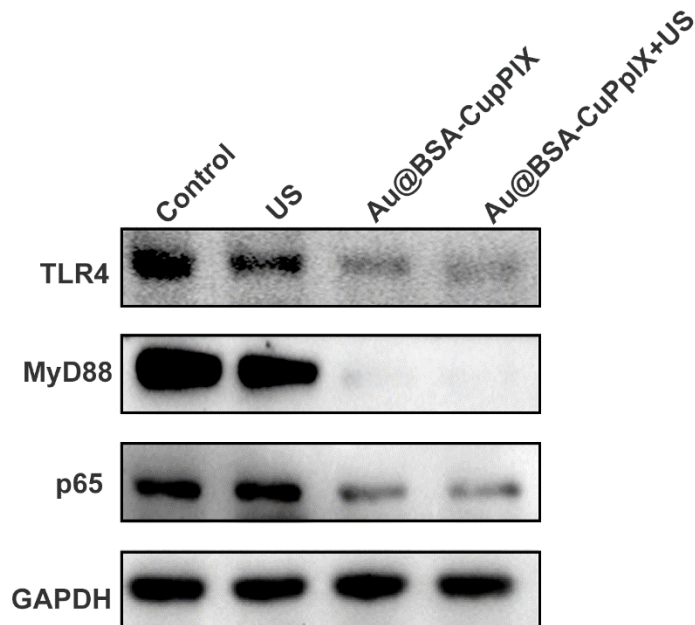

**Figure S4.** Western blot analysis of the expression of TLR4, MyD88, and p65 in various treatments of HCT116 cells. HCT116 cells were co-cultured with *F. nucleatum* for 48 h before treatments.

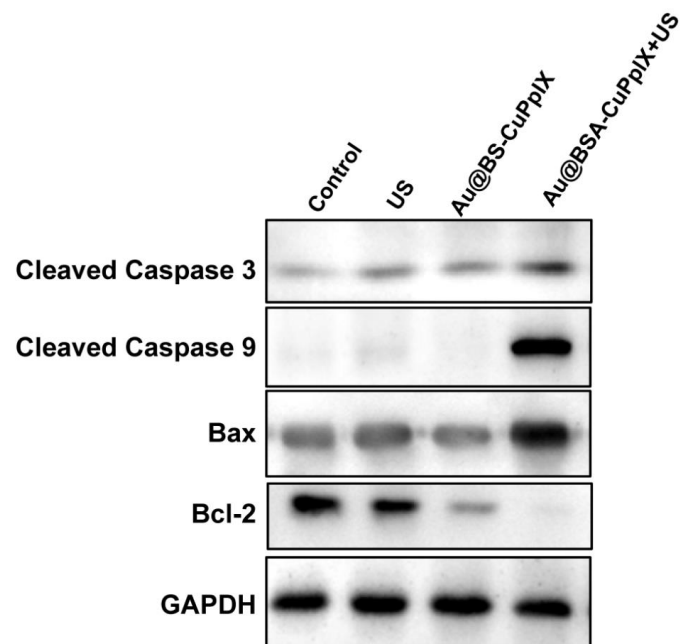

**Figure S5.** Western blot analysis of the expression of the apoptosis-related proteins (Cleaved Caspase 3, Cleaved Caspase 9, Bax, Bcl-2) in various treatments of HCT116 cells protein.

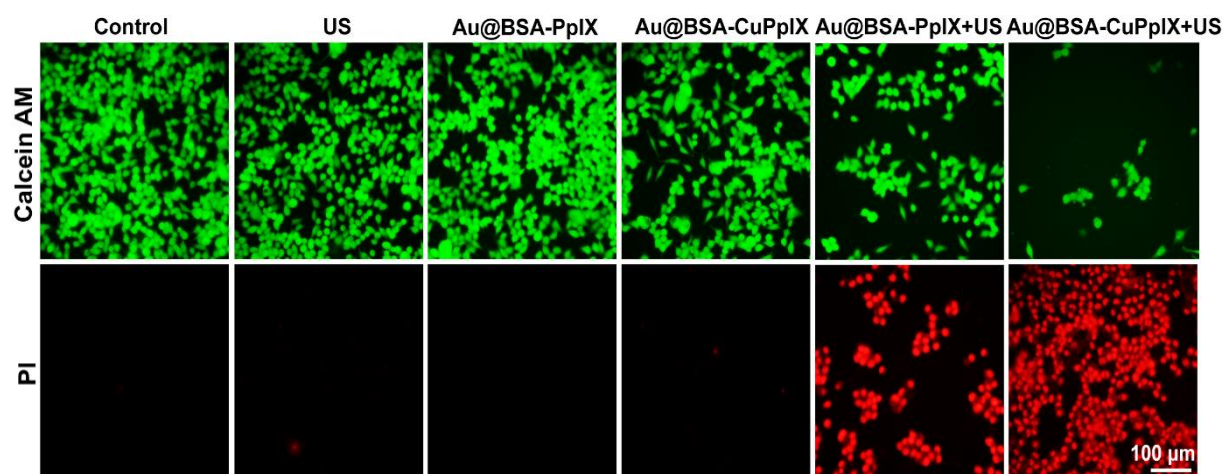

**Figure S6.** Inverted fluorescence microscope images of HCT116 cells stained by Calcein-AM&PI dyes in different treatments (Green fluorescence: calcein AM representing living cells, red fluorescence: PI representing dead cells).

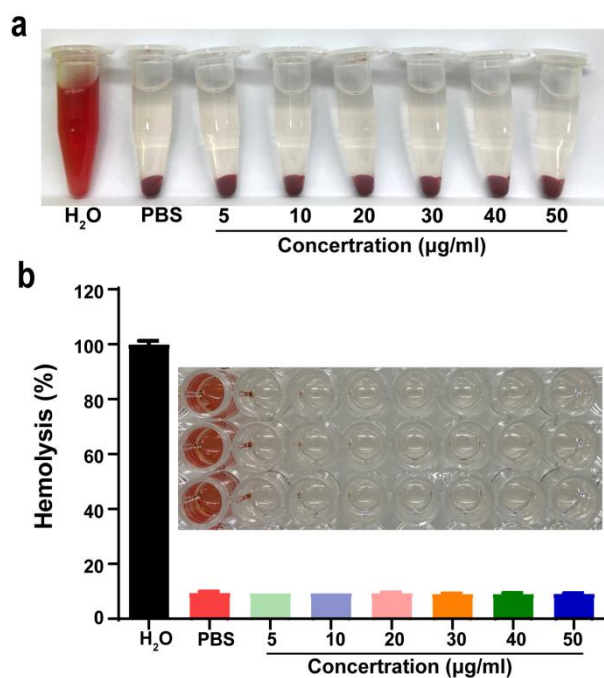

**Figure S7.** a) The hemolysis of blood cells in the different concentrations of Au@BSA-CuPpIX treatments. b) The ratio of hemolysis in the subgroups.

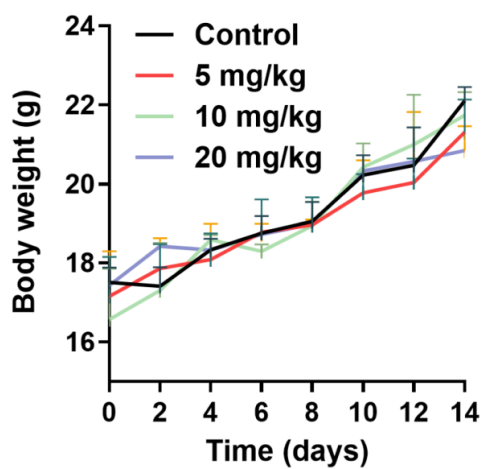

**Figure S8.** Mice's body weight after receiving different concentrations of Au@BSA-CuPpIX ( $5 \text{ mg kg}^{-1}$ ,  $10 \text{ mg kg}^{-1}$ ,  $20 \text{ mg kg}^{-1}$ ) treatments.

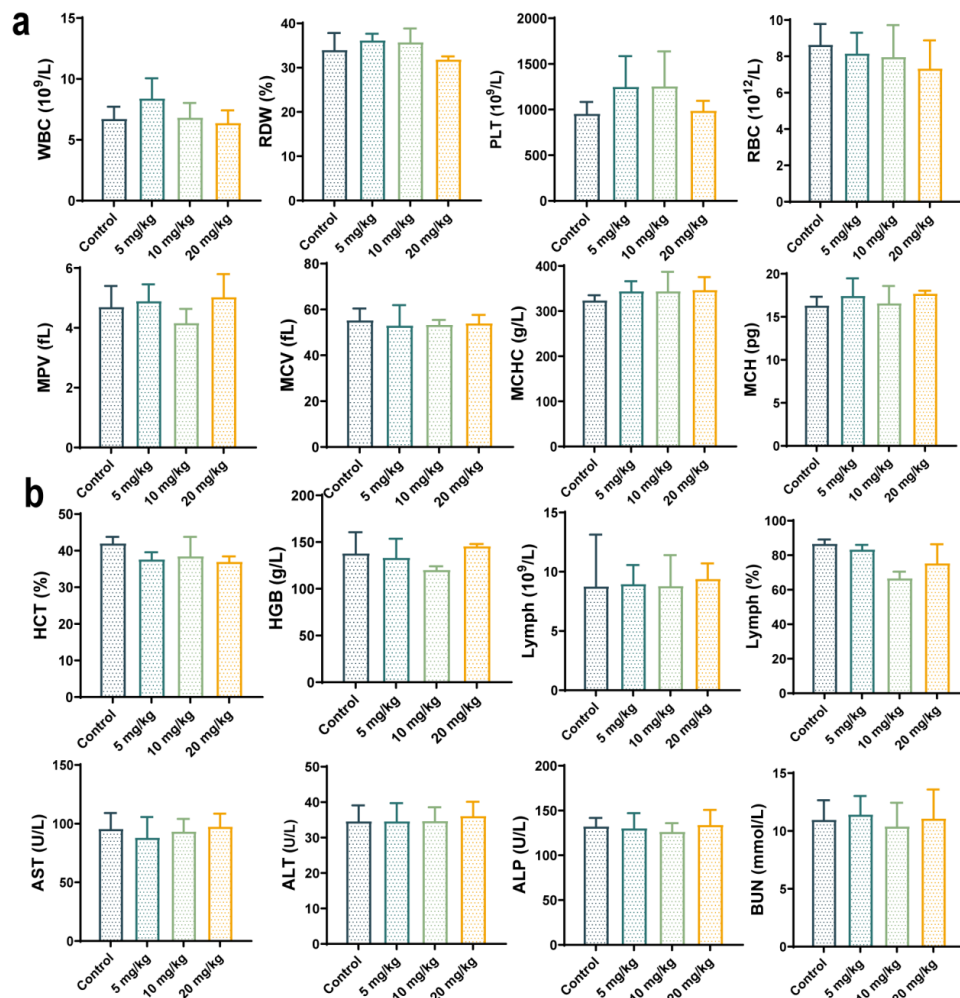

**Figure S9.** a) and b) Hematological index and biochemical blood analysis of mice after intravenous injection with different concentrations of Au@BSA-CuPpIX ( $5 \text{ mg kg}^{-1}$ ,  $10 \text{ mg kg}^{-1}$ ,  $20 \text{ mg kg}^{-1}$ ) treatments.

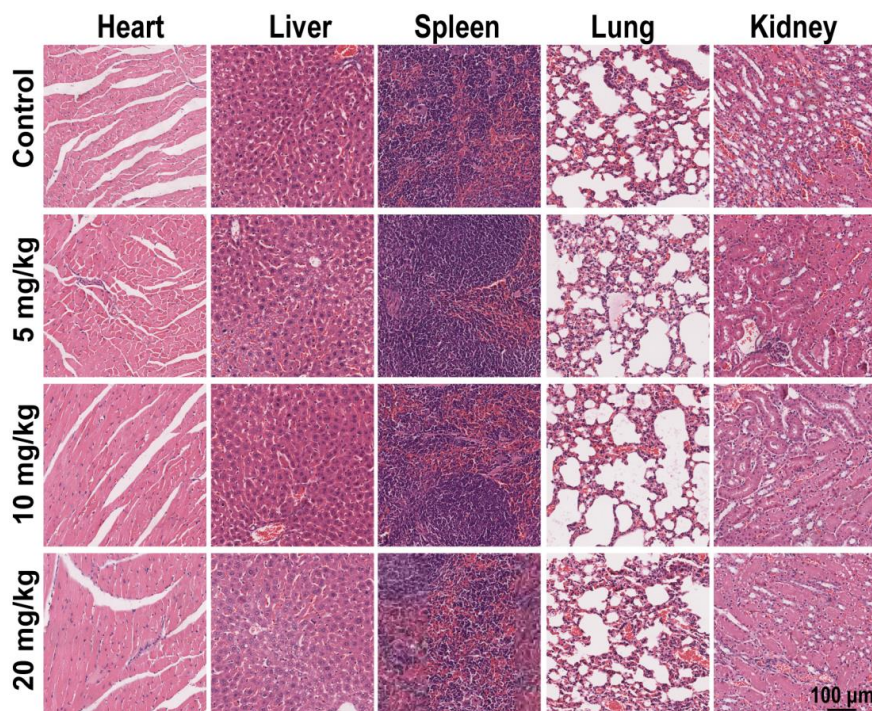

**Figure S10.** H&E staining of right kidney, heart, liver, spleen and lung after receiving different concentrations of Au@BSA-CuPpIX ( $5 \text{ mg kg}^{-1}$ ,  $10 \text{ mg kg}^{-1}$ ,  $20 \text{ mg kg}^{-1}$ ) treatments.

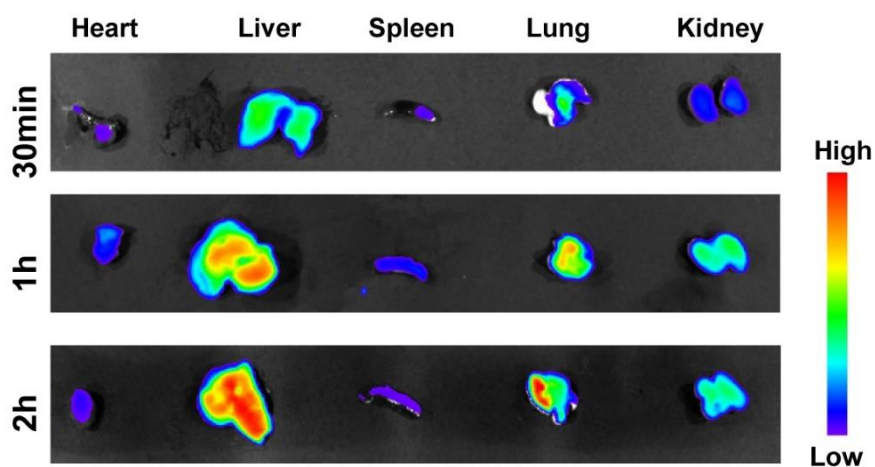

**Figure S11.** The fluorescence signal of cy5.5-labeled Au@BSA-CuPpIX in organs of mice after intravenous injection at 30 min, 1 h and 2 h.

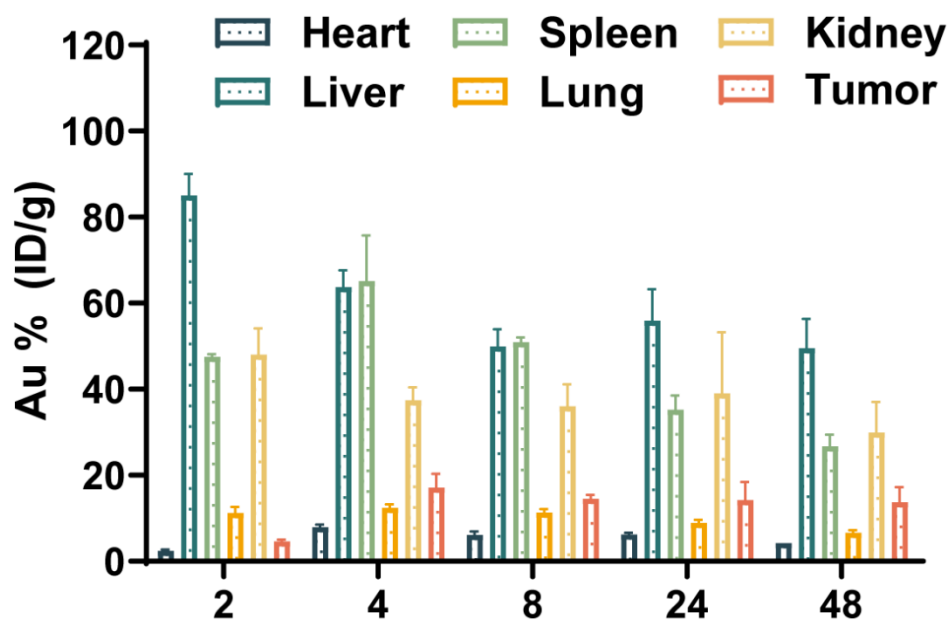

**Figure S12.** Analysis of Au NPs biodistribution in the Heart, kidney, lung, spleen, liver and tumor at 48h. The data are presented as the mean  $\pm$  SD.

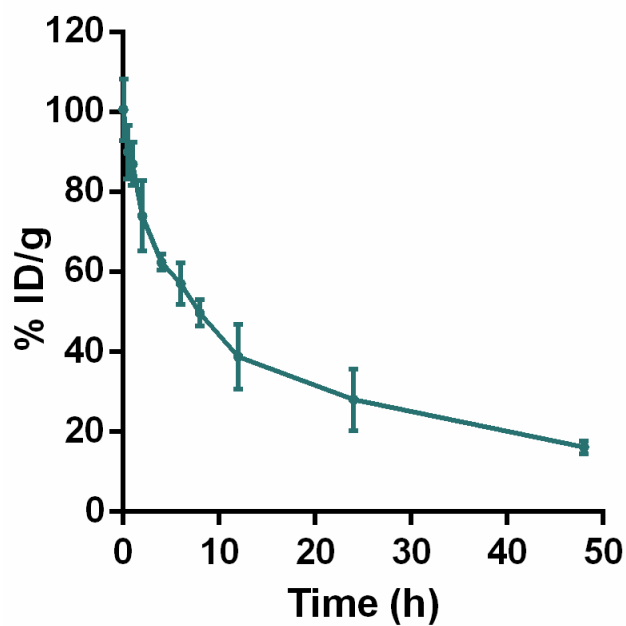

**Figure S13.** Blood-circulation curve in rats injected intravenously with Au@BSA-CuPpIX (Mean  $\pm$  SD, n=3)



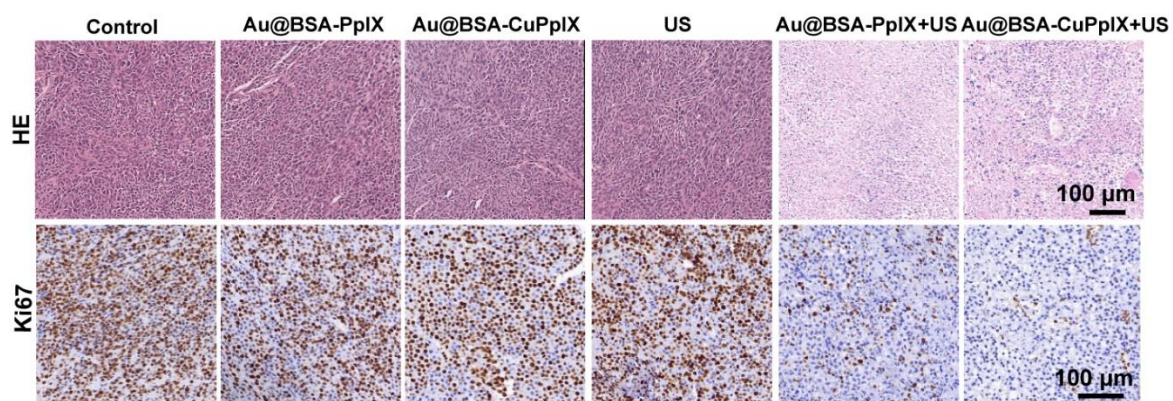

**Figure S14.** Representative HE, Ki67 stained sections of HCT116 tumor tissue at the end of the experiments in a subcutaneously implanted tumor model in a nude mouse.

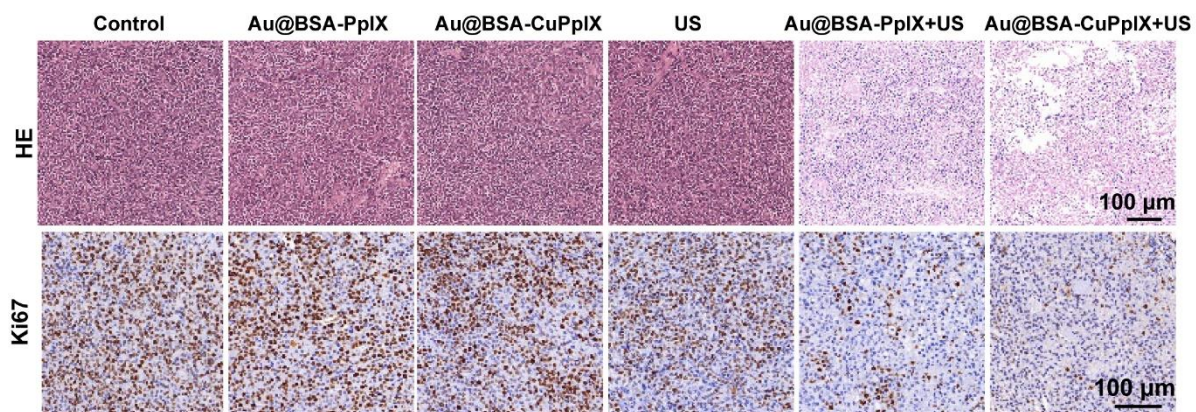

**Figure S15.** HE and Ki67 staining of the tumor after different treatments in the orthotopic CRC model.
